# Supplementary material for: Quality of Life and Its Psychosocial Predictors among Patients with Disorders of Gut–Brain Interaction: A Comparison with Age- and Sex-Matched Controls
Source: MDPI journal article supplement (doi:10.3390/healthcare12070757), 2024-03-30
Supplement: s1 [file s1]

**Supplementary Table S1**

*Zero-order correlations between QoL and all sociodemographic and clinical variables, separately for patients with DGBI ( $n = 71$ ) and healthy controls (HC;  $n = 71$ ).*

| Variable(s)                                 | DGBI     |                                  | HC       |                                  |
|---------------------------------------------|----------|----------------------------------|----------|----------------------------------|
|                                             | <i>n</i> | Correlation coefficient <i>r</i> | <i>n</i> | Correlation coefficient <i>r</i> |
| Age                                         | 68       | .179                             | 71       | .275*                            |
| Gender, female                              | 68       | .012                             | 71       | -.033                            |
| Education, higher                           | 68       | .074                             | 71       | .076                             |
| Civil Status, married                       | 68       | .178                             | 71       | .225                             |
| Work Status, workers                        | 68       | -.022                            | 71       | .098                             |
| Living Status, living with someone          | 68       | -.023                            | 71       | -.065                            |
| Drinking alcohol                            | 66       | -.026                            | 71       | .034                             |
| Smoking                                     | 66       | .009                             | 71       | -.126                            |
| FGID Diagnosis                              | 66       | .035                             |          |                                  |
| Long-term symptoms onset (> 1 year)         | 66       | .167                             |          |                                  |
| History of previous visits for GI symptoms  | 68       | .047                             |          |                                  |
| Presence of any comorbidity                 | 58       | .084                             |          |                                  |
| Currently under pharmacological treatment   | 53       | -.050                            |          |                                  |
| Family history of a GI disease              | 55       | .120                             | 71       | .035                             |
| Previous surgical treatment for GI problems | 57       | -.071                            |          |                                  |

*Note.* DGBI = Disorders of Gut-Brain Interaction; HC = Healthy Controls; GI = Gastrointestinal. \*  $p < .05$
